# Supplementary material for: Mechanism of Action of Non-Synonymous Single Nucleotide Variations Associated with α-Carbonic Anhydrase II Deficiency
Source: PubMed Central journal article supplement (PMC6864701; doi:10.3390/molecules24213987), 2019-11-04
Supplement: molecules-24-03987-s001.pdf [file molecules-24-03987-s001.pdf]

# Supplementary Materials: Mechanism of action of non-synonymous single nucleotide variations associated with $\alpha$ -carbonic anhydrase II deficiency

Taremekedzwa Allan Sanyanga <sup>1</sup>, Bilal Nizami <sup>1,2</sup> and Özlem Tastan Bishop <sup>1\*</sup>

**Table S1.** Identified CA-II residues important for structure, function and stability.

| Residue | Functional role                                                                                                                         | Reference <sup>a</sup> |
|---------|-----------------------------------------------------------------------------------------------------------------------------------------|------------------------|
| Trp5    | Primary aromatic cluster residue, tertiary CO <sub>2</sub> binding pocket formation, His64 stabilisation when in the "out" conformation | [1–3]                  |
| Tyr7    | Primary aromatic cluster residue, active site water network coordination                                                                | [1–9]                  |
| Trp16   | Primary aromatic cluster residue                                                                                                        | [1–3]                  |
| Phe20   | Primary aromatic cluster residue                                                                                                        | [1–3]                  |
| Ser29   | Enzymatic stability                                                                                                                     | [10,11]                |
| Asn62   | Active site water network coordination                                                                                                  | [4]                    |
| His64   | Proton shuttling residue, tertiary CO <sub>2</sub> binding pocket formation                                                             | [1,4–8]                |
| Phe66   | Secondary aromatic cluster residue, secondary CO <sub>2</sub> binding pocket formation                                                  | [1,5–8]                |
| Asn67   | Active site water network coordination                                                                                                  | [12]                   |
| Phe70   | Secondary aromatic cluster residue                                                                                                      | [1–3]                  |
| Phe93   | Secondary aromatic cluster residue                                                                                                      | [1–3]                  |
| Gln92   | Secondary Zn <sup>2+</sup> ligand                                                                                                       | [1,4]                  |
| His94   | Zn <sup>2+</sup> coordination                                                                                                           | [1,4]                  |
| Phe95   | Secondary aromatic cluster residue, secondary CO <sub>2</sub> binding pocket formation                                                  | [1,5–8]                |
| His96   | Zn <sup>2+</sup> coordination                                                                                                           | [1,4]                  |
| Trp97   | Secondary aromatic cluster residue, secondary CO <sub>2</sub> binding pocket formation                                                  | [1,5–8]                |
| Glu106  | Orientation of Zn <sup>2+</sup> water ligand molecule for catalysis                                                                     | [1]                    |
| Glu117  | Zn <sup>2+</sup> affinity and catalytic efficiency, secondary Zn <sup>2+</sup> ligand                                                   | [13]                   |
| His119  | Zn <sup>2+</sup> coordination                                                                                                           | [1,4]                  |
| Val121  | Primary CO <sub>2</sub> binding pocket formation                                                                                        | [1,5–8]                |
| Val142  | Primary CO <sub>2</sub> binding pocket formation                                                                                        | [1,5–8]                |
| Phe175  | Secondary aromatic cluster residue                                                                                                      | [1–3]                  |
| Phe178  | Secondary aromatic cluster residue                                                                                                      | [1–3]                  |
| Leu197  | Primary CO <sub>2</sub> binding pocket formation                                                                                        | [1,5–8]                |
| Thr198  | Deep water molecule stabilisation, catalytic orientation of Zn <sup>2+</sup> water ligand molecule                                      | [4]                    |
| Thr199  | Active site water coordination, tertiary CO <sub>2</sub> binding pocket formation                                                       | [4]                    |
| Pro200  | Tertiary CO <sub>2</sub> binding pocket formation                                                                                       | [1,5–8]                |
| Trp208  | Primary CO <sub>2</sub> binding pocket formation                                                                                        | [1,5–8]                |
| Phe225  | Secondary aromatic cluster residue, secondary CO <sub>2</sub> binding pocket formation                                                  | [1,5–8]                |
| Asn243  | Tertiary CO <sub>2</sub> binding pocket formation, secondary Zn <sup>2+</sup> ligand                                                    | [1,5–8]                |
| Arg245* | Enzyme stability                                                                                                                        | [14]                   |

\* associated with stability reduction in CA-I

<sup>a</sup> references at end of supplementary data

**Table S2.** Table of UniProt CA accession numbers for sequences used in motif discovery.

| Sequence | UniProt accession |
|----------|-------------------|
| CA-I     | P00915            |
| CA-II    | P00918            |
| CA-III   | P07451            |
| CA-IV    | P22748            |
| CA-VA    | P35218            |
| CA-VB    | Q9Y2D0            |
| CA-VI    | P23280            |
| CA-VII   | P43166            |
| CA-VIII  | P35219            |
| CA-IX    | Q16790            |
| CA-X     | Q9NS85            |
| CA-XI    | O75493            |
| CA-XII   | O43570            |
| CA-XIII  | Q8N1Q1            |
| CA-XIV   | Q9ULX7            |
| CA-XV    | Q99N23            |

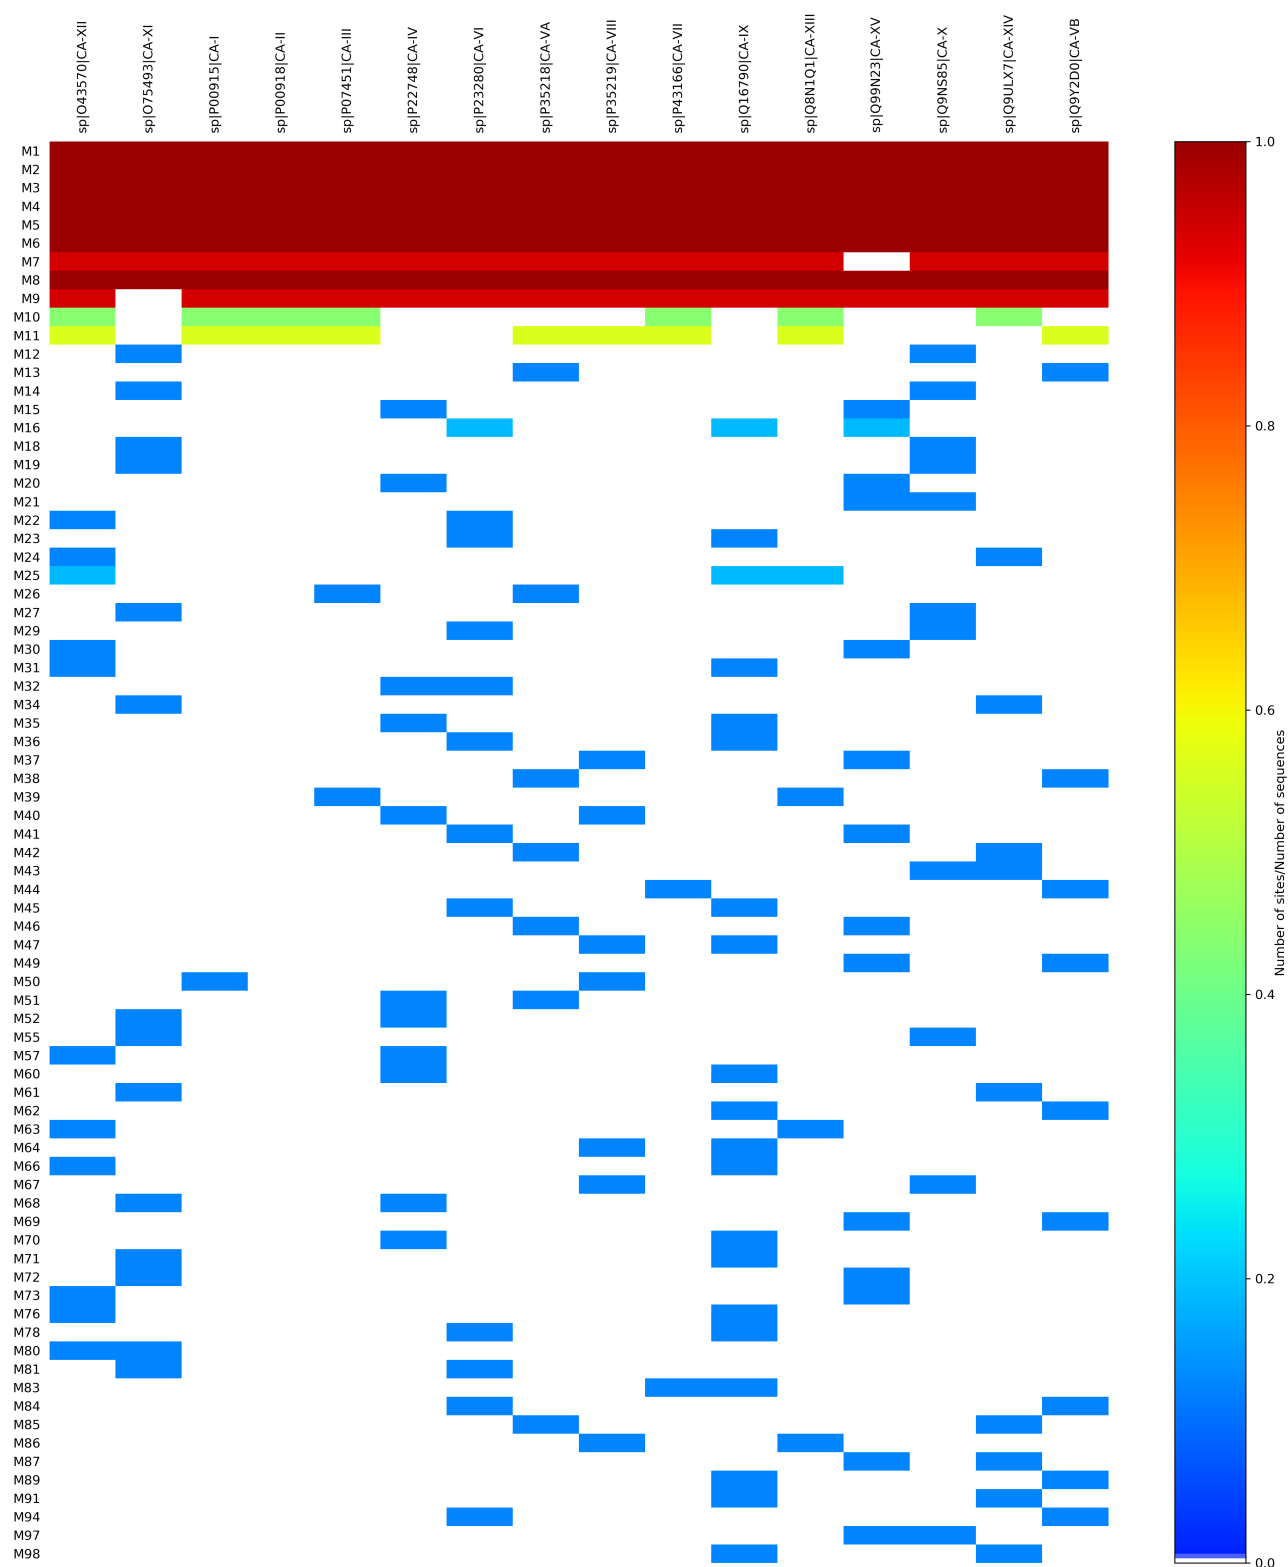

**Figure S1.** Heat map of all conserved motifs within human  $\alpha$ -CA family and associated UniProt accession. Motif conservation is represented as number of motif sites per total protein sequences. A value of zero shows that motifs are not conserved in any sequence, whereas a value of 1 shows that motif is conserved in all sequences. The prefix 'M' represents the word motif.

**Table S3.** Zn<sup>2+</sup> non-bonded, bonds, angles and dihedral parameters derived within this study. **K<sub>b</sub>**: bond force constant; **K<sub>θ</sub>**: angle force constant; **R<sub>min</sub>**: vdW radius; **ε**: LJ potential well energy.

**Non-bonded:**

| Atom | R <sub>min</sub> (Å) | ε (kcal/mol) |
|------|----------------------|--------------|
| M1   | 1.40                 | 0.02         |
| Y1   | 1.82                 | 0.17         |
| Y2   | 1.82                 | 0.17         |
| Y3   | 1.82                 | 0.17         |
| Y4   | 1.77                 | 0.15         |

**Bonds:**

| Bond type | K <sub>b</sub> (kcal/mol/Å <sup>2</sup> ) | Bond length (Å) |
|-----------|-------------------------------------------|-----------------|
| M1-Y4     | 41.20                                     | 2.12            |
| Y1-M1     | 91.70                                     | 1.98            |
| Y2-M1     | 94.30                                     | 1.98            |
| Y3-M1     | 93.00                                     | 1.98            |

**Angles:**

| Angle type | K <sub>θ</sub> (kcal/mol/radian <sup>2</sup> ) | Equilibrium angle degrees (θ) |
|------------|------------------------------------------------|-------------------------------|
| CC-Y3-M1   | 56.44                                          | 127.30                        |
| CR-Y1-M1   | 38.97                                          | 125.70                        |
| CR-Y2-M1   | 53.67                                          | 127.46                        |
| M1-Y1-CV   | 39.62                                          | 128.05                        |
| M1-Y2-CV   | 54.89                                          | 126.22                        |
| M1-Y3-CR   | 54.18                                          | 125.48                        |
| M1-Y4-HW   | 44.55                                          | 122.59                        |
| Y1-M1-Y2   | 39.89                                          | 116.07                        |
| Y1-M1-Y3   | 37.44                                          | 115.90                        |
| Y1-M1-Y4   | 31.02                                          | 101.10                        |
| Y2-M1-Y3   | 36.29                                          | 114.63                        |
| Y2-M1-Y4   | 36.83                                          | 105.42                        |
| Y3-M1-Y4   | 30.04                                          | 100.62                        |

**Dihedral:**

| Definition  | Divider | Barrier (kcal/mol) | Phase degrees (θ) | Periodicity |
|-------------|---------|--------------------|-------------------|-------------|
| X -CC-Y3-X  | 2       | 4.80               | 180.0             | 2.0         |
| X -CR-Y1-X  | 2       | 10.00              | 180.0             | 2.0         |
| X -CR-Y2-X  | 2       | 10.00              | 180.0             | 2.0         |
| X -CV-Y1-X  | 2       | 4.80               | 180.0             | 2.0         |
| X -CV-Y2-X  | 2       | 4.80               | 180.0             | 2.0         |
| X -Y3-CR-X  | 2       | 10.00              | 180.0             | 2.0         |
| CX-CT-CC-Y3 | 1       | 0.05               | 180.0             | -4.0        |
| CX-CT-CC-Y3 | 1       | 0.74               | 0.0               | -3.0        |
| CX-CT-CC-Y3 | 1       | 0.20               | 0.0               | -2.0        |
| CX-CT-CC-Y3 | 1       | 0.69               | 0.0               | 1.0         |

M1: Zn; Y1: His94 NE2 (epsilon nitrogen); Y2: His96 NE2 ((epsilon nitrogen)) Y3: His199 ND1 (delta hydrogen); Y4: O (H<sub>2</sub>O); CC: CG (gamma carbon); CR: CE1 (epsilon carbon); CV: CD2 (delta carbon)

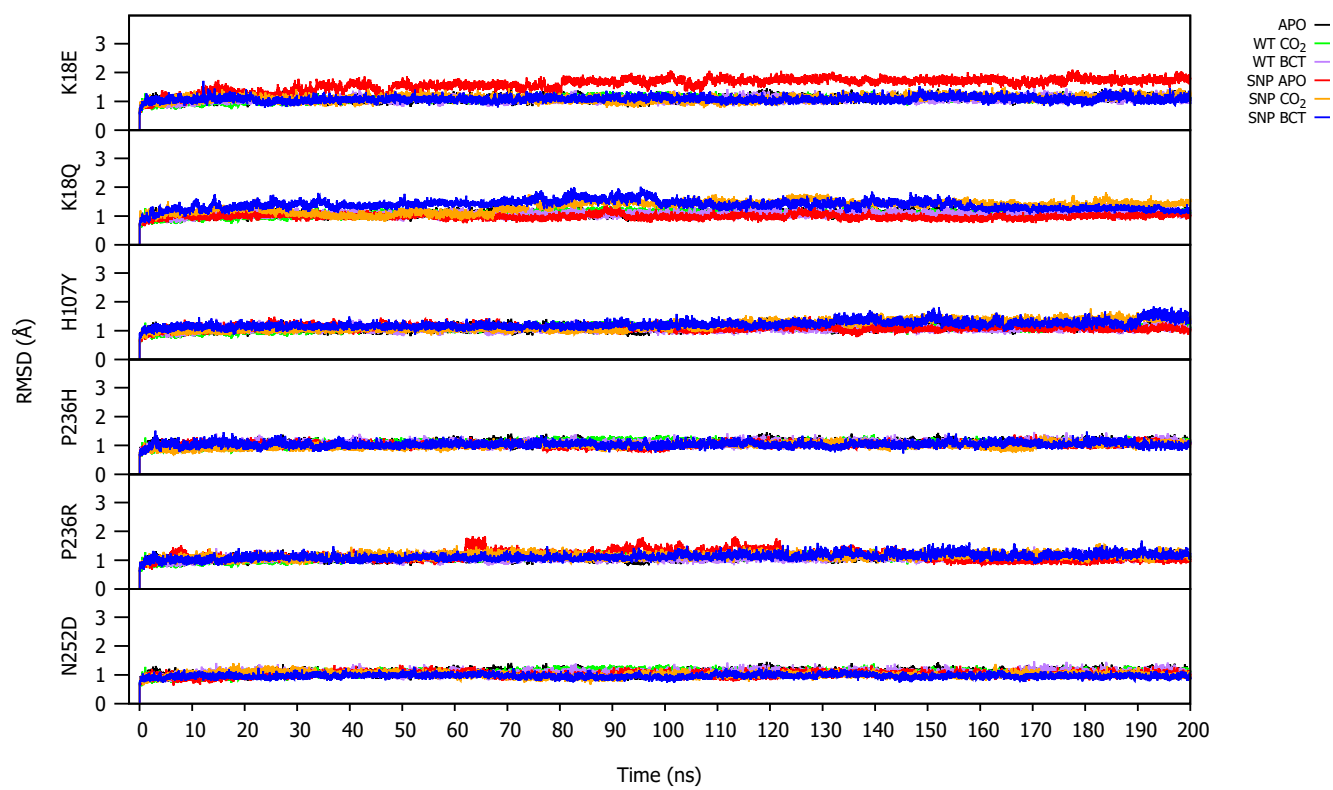

**Figure S2.** RMSD comparison between the WT and variant proteins during MD.



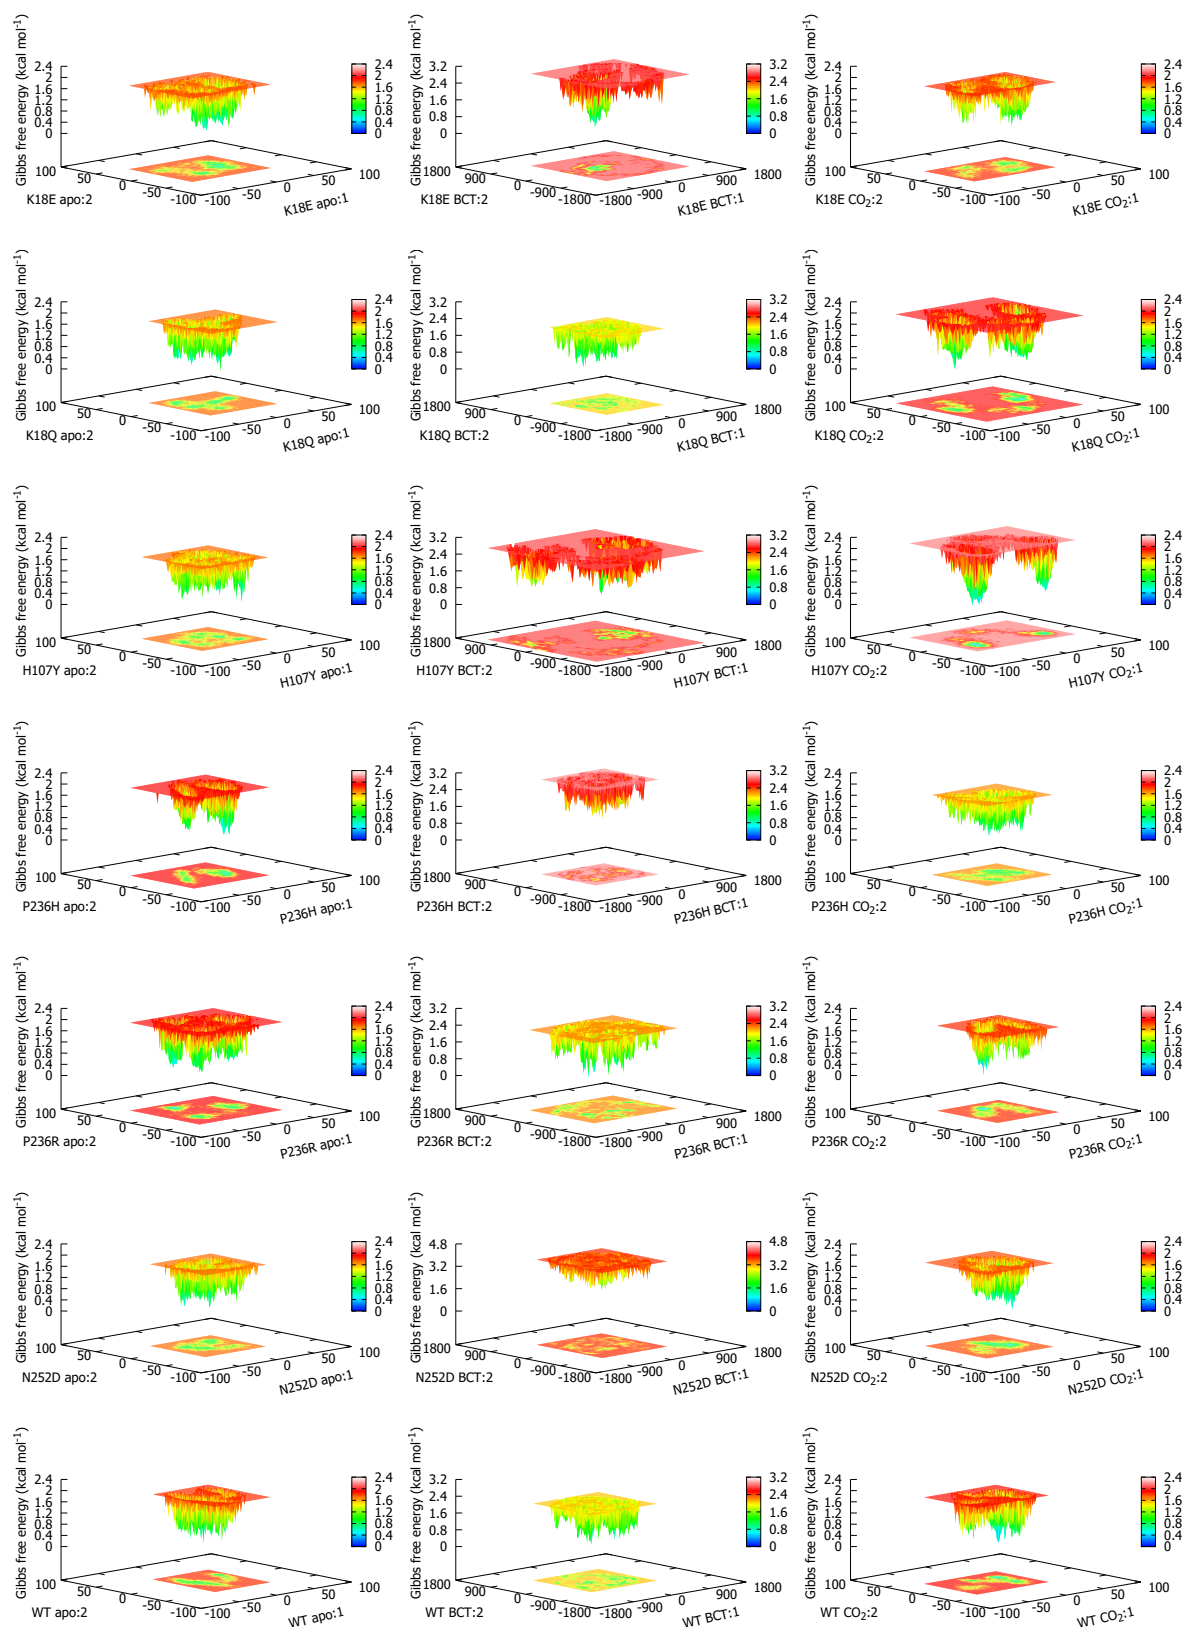

**Figure S3.** 3-dimensional (3D) plot of PC1 vs PC2 of the WT and variants proteins as a function of free energy. 2D PCA is projected onto the x-axis and y-axis. Free energy is represented in kcal mol<sup>-1</sup>.

**Table S5.** Eigenvalue fraction of each principal component for the active site residues within the wild-type and variant proteins in the absence (apo) and presence (non apo) of CO<sub>2</sub>.

| <b>Variant</b> | <b>Protein</b>  | <b>PC1</b> | <b>PC2</b> | <b>PC3</b> |
|----------------|-----------------|------------|------------|------------|
| <b>K18E</b>    | Apo             | 0.5503     | 0.2500     | 0.1997     |
|                | BCT             | 0.4836     | 0.3165     | 0.1999     |
|                | CO <sub>2</sub> | 0.5772     | 0.2218     | 0.2010     |
| <b>K18Q</b>    | Apo             | 0.5260     | 0.2732     | 0.2009     |
|                | BCT             | 0.4497     | 0.3598     | 0.1905     |
|                | CO <sub>2</sub> | 0.6091     | 0.2647     | 0.1261     |
| <b>H107Y</b>   | Apo             | 0.4439     | 0.3322     | 0.2239     |
|                | BCT             | 0.5688     | 0.2764     | 0.1548     |
|                | CO <sub>2</sub> | 0.7201     | 0.1670     | 0.1129     |
| <b>P236H</b>   | Apo             | 0.5535     | 0.2628     | 0.1837     |
|                | BCT             | 0.5195     | 0.2741     | 0.2064     |
|                | CO <sub>2</sub> | 0.4846     | 0.2977     | 0.2177     |
| <b>P236R</b>   | Apo             | 0.4693     | 0.3107     | 0.2200     |
|                | BCT             | 0.4772     | 0.3415     | 0.1813     |
|                | CO <sub>2</sub> | 0.4218     | 0.3208     | 0.2574     |
| <b>N252D</b>   | Apo             | 0.4415     | 0.3358     | 0.2227     |
|                | BCT             | 0.4635     | 0.3607     | 0.1758     |
|                | CO <sub>2</sub> | 0.4348     | 0.3235     | 0.2417     |
| <b>WT</b>      | Apo             | 0.4673     | 0.3253     | 0.2074     |
|                | BCT             | 0.4256     | 0.3550     | 0.2194     |
|                | CO <sub>2</sub> | 0.5399     | 0.2589     | 0.2012     |



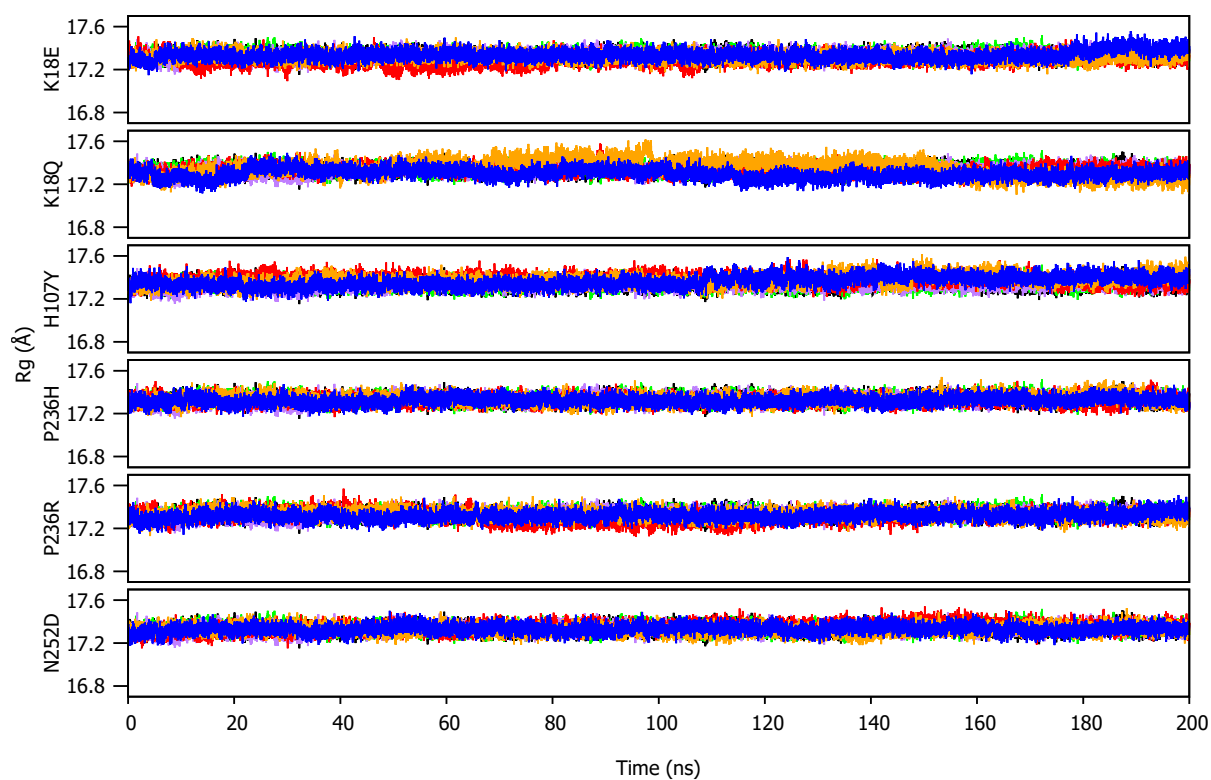

**Figure S4.** Rg comparison between the WT and variant proteins during MD.

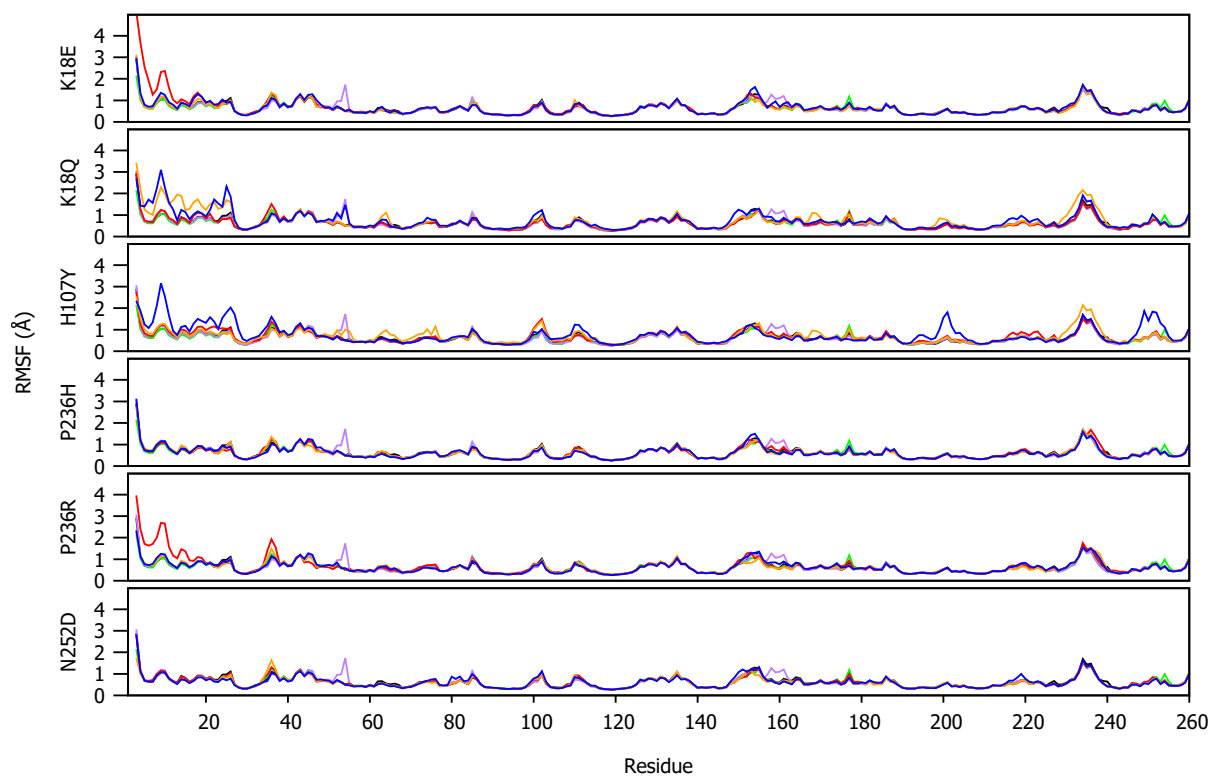

**Figure S5.** Residue RMSF comparison between the WT and variant proteins.

**Table S6.** Variant residues showing decreases and increases to  $\Delta L$  during MD simulation. Residues from Table reftab:residues are underlined and highlighted in bold. SNV positions are underlined, italicised and highlighted in bold red.

| Variant                                                                | Apo                                                                                            | BCT                                                                        | CO <sub>2</sub>                                                                                                |
|------------------------------------------------------------------------|------------------------------------------------------------------------------------------------|----------------------------------------------------------------------------|----------------------------------------------------------------------------------------------------------------|
| <b><math>\Delta L</math> decrease (Residue accessibility increase)</b> |                                                                                                |                                                                            |                                                                                                                |
| <b>K18E</b>                                                            | His4 His10 <b><u>Trp16</u></b> Ile22<br>Gly170 Phe230 Asn231<br>Glu235 Pro236 Glu237<br>Glu238 | Lys111 Gly155 Leu156                                                       | Ala54 Lys158 Val159 Val160<br>Asp161 Leu163 Asp164<br>Ser165 Ile166 Asn177 Phe178                              |
| <b>K18Q</b>                                                            | His3 Ile22 Ala152                                                                              | His3 His4 <b><u>Trp5</u></b> Gly6 Gly8<br>Lys9 His10 Asn11 Lys24<br>Lys111 | His3 His4 Lys9 Lys24 Lys158<br>Val159 Val160 Asp161 Leu163<br>Asp164 Ser165 Ile166                             |
| <b>H107Y</b>                                                           | Lys24                                                                                          | Val49 Ser50 Asp52 Gln53<br>Lys111 Leu184                                   | Asp52 Gln53 Gly155 Lys158<br>Val159 Val160 Asp161 Val162<br>Leu163 Ser165 Ile166 Asp179<br>Pro180              |
| <b>P236H</b>                                                           | Ile22 Asp101 Gly155 Thr199<br>His236 Glu237 Glu238                                             | His3 Gly155 Leu156 Phe178<br>Asp179 Pro180 Arg181<br>Leu183 Pro201         | His3 Ala54 Lys158 Val159<br>Val160 Asp161 Val162 Leu163<br>Asp164 Ser165 Ile166 Ala173<br>Phe175 Asn177 Glu237 |
| <b>P236R</b>                                                           | Pro21 Ile22 Phe230 Asn231<br>Glu235 Arg236 Glu237<br>Glu238                                    | Val49 Asp52 Gln53 Pro180                                                   | Asp52 Ile59 Lys158 Val159<br>Val160 Asp161 Val162 Leu163<br>Ile166 Pro180 Glu237                               |
| <b>N252D</b>                                                           | Leu163 Asp164                                                                                  | Lys111 Gly155 Leu156<br>Gln157 Leu183                                      | Ala54 Lys158 Val159 Val160<br>Asp161 Val162 Leu163<br>Asp164 Ser165 Ile166 Phe175                              |
| <b><math>\Delta L</math> increase (Residue accessibility decrease)</b> |                                                                                                |                                                                            |                                                                                                                |
| <b>K18E</b>                                                            | <b><u>Trp5</u></b> Lys111 Lys153 Leu188                                                        | Ala152 Lys153                                                              | Gly155 Leu156 Leu188                                                                                           |
| <b>K18Q</b>                                                            | Thr35 Lys111 Pro154 Gly155<br>Leu156 Lys158 Val159 Pro180<br>Gly182 Leu183 Glu220              | Gly12 Pro13 Glu14 Asp19<br>Leu163 Glu233                                   | Ile22 Ala54 Ala152                                                                                             |
| <b>H107Y</b>                                                           | <b><u>Ser29</u></b> Val31 Asp101 Lys111<br>Leu140 Ala152 Lys153 Val241                         | Val31 Ala54 Lys158                                                         | Gly25 Glu26 Arg27 Ala54<br>Lys111 Gln248 Lys251                                                                |
| <b>P236H</b>                                                           | His3 Thr35 Ala152 Lys158<br>Val159 Val160                                                      | His36 Thr37 Leu163 Asp164<br>Gly170                                        | Leu156 <b><u>Phe225</u></b> Arg226                                                                             |
| <b>P236R</b>                                                           | His3 Gly6 <b><u>Tyr7</u></b> Thr35 Gly98<br>Ser99 Leu100 Lys111 Asp242                         | Ala54 Leu163 Asp164 Gly170<br><b><u>Thr199</u></b> Gly232 Gly234           | Ala54 Leu156 Gly170                                                                                            |
| <b>N252D</b>                                                           | His3 Thr35 Gly63 Pro154<br>Gly155 Leu156 Gln157<br>Lys158 Pro180 Leu183                        | His3 Thr35 Ser43 Ala152<br>Lys153                                          | Gly155 Leu156 Arg226                                                                                           |

**Table S7.** Variant residues showing decreases and increases to  $\Delta BC$  during MD simulation. Residues from Table S1 are underlined and highlighted in bold. SNV positions are underlined, italicised and highlighted in bold red.

| Variant                                                                     | Apo                                                                                                  | BCT                                                                                                                             | CO <sub>2</sub>                                                                                               |
|-----------------------------------------------------------------------------|------------------------------------------------------------------------------------------------------|---------------------------------------------------------------------------------------------------------------------------------|---------------------------------------------------------------------------------------------------------------|
| <b><math>\Delta BC</math> decrease (reduction in residue communication)</b> |                                                                                                      |                                                                                                                                 |                                                                                                               |
| K18E                                                                        | <u>Trp5</u> Gly6 Pro200 Met240<br><u>Asp242</u> <u>Asn243</u>                                        | <u>His64</u> His107 Lys113 <u>Glu117</u><br>Ile145 Leu147 Lys153 <u>Thr199</u><br>Ile215 Val222                                 | Asn61 Ala77 Leu90 Val162<br>Gly182 Leu183 Val217<br><b>Phe225</b>                                             |
| K18Q                                                                        | Gly63 <u>His94</u> <u>Glu117</u> <u>His119</u><br>Leu147 Pro180 Leu183<br>Asp242 Trp244              | <u>Trp5</u> Gly12 Pro13 <u>Trp16</u><br><u>Phe66</u> <u>Asn67</u> His107 <u>Glu117</u><br>Thr168 Asp242 <u>Asn243</u><br>Pro246 | <u>Trp5</u> Ala54 Leu60 Asn61<br><u>His64</u> Phe70 Gly182 <u>Phe225</u><br>Asp242                            |
| H107Y                                                                       | Val31 Gly63 <u>His94</u> <u>Glu117</u><br><u>His119</u> Leu140 <u>Val142</u><br>Gly144               | Val31 Ala54 <u>Phe66</u> <u>Tyr107</u><br><u>Glu117</u> Gly144 <u>Thr199</u>                                                    | Ile33 Ala54 <u>His64</u> Glu69<br><u>Glu117</u> Leu147 <u>Thr199</u><br>Val222 <b>Phe225</b>                  |
| P236H                                                                       | Gly63 Val68 <u>Gln92</u> Val121<br><u>Val142</u> Leu147 Val159<br>Asp242                             | <u>Phe66</u> <u>Phe70</u> <u>Gln92</u> <u>Phe95</u><br><u>Glu117</u> Leu163                                                     | Asn61 Ala77 Leu90 Leu147<br>Gly182 Leu183 Val222<br><b>Phe225</b>                                             |
| P236R                                                                       | Gly6 <u>His94</u> Ser105 <u>His119</u><br><u>Val142</u> Asp242 <u>Asn243</u>                         | Tyr51 Ala54 <u>Asn67</u> <u>Phe95</u><br><u>Glu117</u> Leu118 Leu147<br><u>Thr199</u>                                           | Ala54 Leu60 Asn61 Glu69<br>Gly182 Leu183 <u>Phe225</u>                                                        |
| N252D                                                                       | Gly63 <u>His64</u> <u>His94</u> <u>His119</u><br>Leu156 Pro180 Leu183<br><u>Thr199</u> <b>Phe225</b> | <u>His64</u> His107 <u>Glu117</u> Leu147<br>Lys153 <u>Thr199</u> Ile215                                                         | Leu60 Asn61 <u>Phe70</u> Ala77<br>Gly182 <b>Phe225</b>                                                        |
| <b><math>\Delta BC</math> increase (residue communication increase)</b>     |                                                                                                      |                                                                                                                                 |                                                                                                               |
| K18E                                                                        | His4 <u>Trp16</u> <u>His96</u> <u>Thr199</u><br>Phe230                                               | Ser105 Ala116 Leu118 Gly155<br>Leu156 Leu183 Val210 Val217                                                                      | Ala54 Ala65 Val68 <b>Phe93</b><br><b>Phe95</b> Ala116 Leu118 Val159<br><b>Thr199</b>                          |
| K18Q                                                                        | <u>Phe66</u> <u>His96</u> Lys113 Ala116<br>Ile145 Ile215 Val217                                      | Gly8 Asn11 <u>His94</u> Ser105<br>Lys169 Phe230 Trp244<br>Gln248                                                                | <u>Tyr7</u> Gly8 Asn11 Ala65<br><b>Phe66</b> Val68 <u>His96</u> Val160<br>Leu163 <u>Thr199</u> Phe230         |
| H107Y                                                                       | <u>Phe66</u> <u>Asn67</u> <u>Phe95</u> Glu106<br>Leu118 Val217                                       | Thr55 Ala77 Leu90 <u>His94</u><br>Ser105 Val210                                                                                 | Ala65 <u>Phe66</u> <u>Phe93</u> <u>Phe95</u><br><u>His96</u> Glu106 Ala116 Asp179                             |
| P236H                                                                       | <u>His64</u> <u>Phe66</u> <u>His96</u> Ala116<br>Gly155 <u>Thr199</u> Val217                         | Gly63 <u>Phe93</u> <u>His94</u> <u>Trp97</u><br>Val134                                                                          | Ala54 Ala65 <u>Phe66</u> <u>Phe93</u><br><b>Phe95</b> Ala116 Leu163                                           |
| P236R                                                                       | <u>Tyr7</u> <u>Phe66</u> <u>Phe95</u> <u>His96</u><br>Glu106 <u>Thr199</u> Phe230<br>Arg245          | Ala77 <u>His94</u> Ala116 <u>His119</u><br>Val217                                                                               | Ala65 <u>Phe66</u> <u>His94</u> Ala116<br>Leu163 Phe175 Pro180                                                |
| N252D                                                                       | <u>Phe66</u> <u>Asn67</u> <u>Gln92</u> <u>Phe95</u><br><u>His96</u> Ile215 <u>Asn243</u>             | Ser105 Ala116 Gly155<br>Leu156 Leu183 Val217<br><u>Asn243</u> Trp244                                                            | Tyr51 Ala54 Ala65 <b>Phe66</b><br>Val68 Ile91 <u>Gln92</u> <b>Phe93</b><br><u>Val142</u> Val160 Leu163 Ile215 |

**References (Table S1)**

1. Lindskog, S. Structure and mechanism of carbonic anhydrase. *Pharmacology & therapeutics* **1997**, *74*, 1–20.
2. Eriksson, A.E.; Jones, T.A.; Liljas, A. Refined structure of human carbonic anhydrase II at 2.0 Å resolution. *Proteins: Structure, Function, and Bioinformatics* **1988**, *4*, 274–282.
3. Hunt, J.A.; Fierke, C.A. Selection of carbonic anhydrase variants displayed on phage aromatic residues in zinc binding site enhance metal affinity and equilibration kinetics. *Journal of Biological Chemistry* **1997**, *272*, 20364–20372.
4. Silverman, D.N.; McKenna, R. Solvent-mediated proton transfer in catalysis by carbonic anhydrase. *Accounts of chemical research* **2007**, *40*, 669–675.
5. Merz Jr, K.M. Carbon dioxide binding to human carbonic anhydrase II. *Journal of the American Chemical Society* **1991**, *113*, 406–411.
6. Liang, J.Y.; Lipscomb, W.N. Binding of substrate CO<sub>2</sub> to the active site of human carbonic anhydrase II: a molecular dynamics study. *Proceedings of the National Academy of Sciences* **1990**, *87*, 3675–3679.
7. Domsic, J.F.; Avvaru, B.S.; Kim, C.U.; Gruner, S.M.; Agbandje-McKenna, M.; Silverman, D.N.; McKenna, R. Entrapment of carbon dioxide in the active site of carbonic anhydrase II. *Journal of Biological Chemistry* **2008**, *283*, 30766–30771.
8. Alexander, R.S.; Nair, S.K.; Christianson, D.W. Engineering the hydrophobic pocket of carbonic anhydrase II. *Biochemistry* **1991**, *30*, 11064–11072.
9. Mikulski, R.L.; Silverman, D.N. Proton transfer in catalysis and the role of proton shuttles in carbonic anhydrase. *Biochimica et Biophysica Acta (BBA)-Proteins and Proteomics* **2010**, *1804*, 422–426.
10. Mårtensson, L.G.; Jonsson, B.H.; Andersson, M.; Kihlgren, A.; Bergenheim, N.; Carlsson, U. Role of an evolutionarily invariant serine for the stability of human carbonic anhydrase II. *Biochimica et Biophysica Acta (BBA)-Protein Structure and Molecular Enzymology* **1992**, *1118*, 179–186.
11. Almstedt, K.; Lundqvist, M.; Carlsson, J.; Karlsson, M.; Persson, B.; Jonsson, B.H.; Carlsson, U.; Hammarström, P. Unfolding a folding disease: folding, misfolding and aggregation of the marble brain syndrome-associated mutant H107Y of human carbonic anhydrase II. *Journal of molecular biology* **2004**, *342*, 619–633.
12. Silverman, D.N.; Lindskog, S. The catalytic mechanism of carbonic anhydrase: implications of a rate-limiting protolysis of water. *Accounts of chemical research* **1988**, *21*, 30–36.
13. Kiefer, L.L.; Paterno, S.A.; Fierke, C.A. Hydrogen bond network in the metal binding site of carbonic anhydrase enhances zinc affinity and catalytic efficiency. *Journal of the american chemical society* **1995**, *117*, 6831–6837.
14. Tashian, R.E. Genetics of the mammalian carbonic anhydrases. In *Advances in genetics*; Elsevier, 1992; Vol. 30, pp. 321–356.
